# Supplementary material for: Glutamic Acid Residues in HIV-1 p6 Regulate Virus Budding and Membrane Association of Gag
Source: PubMed Central journal article supplement (PMC4848609; doi:10.3390/v8040117), 2016-04-25
Supplement: viruses-08-00117-s001.pdf [file viruses-08-00117-s001.pdf]

# Supplementary Materials: Glutamic Acid Residues in HIV-1 p6 Regulate Virus Budding and Membrane Association of Gag

Melanie Friedrich, Christian Setz, Friedrich Hahn, Alina Matthaehi, Kirsten Fraedrich, Pia Rauch, Petra Henklein, Maximilian Traxdorf, Torgils Fossen and Ulrich Schubert

**Table S1.** <sup>1</sup>H chemical shifts of 2 mM p6 (1-52) E0A in TFE-H<sub>2</sub>O (1:1; v/v) at 300 K.

|               | HN   | H $\alpha$ | H $\beta$ | H $\gamma$              | H $\delta$ | H $\epsilon$ | NH <sub>2</sub> | Ar H                 |
|---------------|------|------------|-----------|-------------------------|------------|--------------|-----------------|----------------------|
| Leu-1         |      | 4.07       | 1.79      | 1.73                    | 1.23/1.01  |              |                 |                      |
| Gln-2         | 8.66 | 4.52       | 2.18/2.08 | 2.44                    |            |              | 7.50/6.72       |                      |
| Ser-3         | 8.31 | 4.51       | 3.91/3.87 |                         |            |              |                 |                      |
| Arg-4         | 8.10 | 4.74       | 1.93      | 1.79/1.73               | 3.25       |              | 7.19            |                      |
| Pro-5         |      | 4.41       |           |                         |            |              |                 |                      |
| <b>Ala-6</b>  | 8.03 | 4.67       | 1.40      |                         |            |              |                 |                      |
| Pro-7         |      | 4.52       | 2.37/2.04 | 2.13                    | 3.78/3.68  |              |                 |                      |
| Thr-8         | 7.82 | 4.37       | 4.25      | 1.25                    |            |              |                 |                      |
| Ala-9         | 7.97 | 4.67       | 1.40      |                         |            |              |                 |                      |
| Pro-10        |      | 4.69       | 2.40/1.96 | 2.12                    | 3.89/3.61  |              |                 |                      |
| Pro-11        |      | 4.46       | 2.30/1.97 | 2.09                    | 3.78/3.69  |              |                 |                      |
| <b>Ala-12</b> | 8.03 | 4.28       | 1.43      |                         |            |              |                 |                      |
| <b>Ala-13</b> | 7.95 | 4.22       | 1.49      |                         |            |              |                 |                      |
| Ser-14        | 7.92 | 4.28       | 3.92/3.86 |                         |            |              |                 |                      |
| Phe-15        | 7.84 | 4.53       | 3.19/3.15 |                         |            |              |                 | 2/6 7.31             |
| Arg-16        | 7.80 | 4.16       | 1.76      | 1.50                    | 3.13       |              | 7.10            |                      |
| Phe-17        | 7.94 | 4.55       | 3.26/3.08 |                         |            |              |                 | 2/6 7.28             |
| Gly-18        | 8.10 | 3.99/3.87  |           |                         |            |              |                 |                      |
| <b>Ala-19</b> | 8.03 | 4.28       | 1.43      |                         |            |              |                 |                      |
| <b>Ala-20</b> | 8.00 | 4.28       | 1.49      |                         |            |              |                 |                      |
| Thr-21        | 7.79 | 4.41       | 4.35      | 1.21                    |            |              |                 |                      |
| Thr-22        | 7.80 | 4.51       | 4.32      | 1.27                    |            |              |                 |                      |
| Thr-23        | 8.01 | 4.48       | 4.33      | 1.32                    |            |              |                 |                      |
| Pro-24        |      | 4.46       |           |                         | 3.91/3.78  |              |                 |                      |
| Ser-25        | 8.09 | 4.42       | 3.99/3.92 |                         |            |              |                 |                      |
| Gln-26        | 7.98 | 4.41       | 2.18/2.06 | 2.42                    |            |              | 7.36/6.65       |                      |
| Lys-27        | 8.06 | 4.33       | 1.93/1.83 | 1.56/1.48               | 1.73       | 3.03         | 7.59            |                      |
| Gln-28        | 8.25 | 4.35       | 2.22/2.14 | 2.45                    |            |              | 7.40/6.69       |                      |
| <b>Ala-29</b> | 8.07 | 4.53       | 1.50      |                         |            |              |                 |                      |
| Pro-30        |      | 4.46       | 2.33/2.02 | 2.11                    | 3.83/3.72  |              |                 |                      |
| Ile-31        | 7.43 | 4.11       | 1.95      | 1.56/1.26/<br>0.97/0.93 |            |              |                 |                      |
| Asp-32        | 8.09 | 4.57       | 2.95      |                         |            |              |                 |                      |
| Lys-33        | 8.01 | 4.11       | 1.91      | 1.58/1.56               | 1.73       | 3.02         | 7.61            |                      |
| <b>Ala-34</b> | 7.77 | 4.29       | 1.51      |                         |            |              |                 |                      |
| Leu-35        | 7.73 | 4.43       | 1.77      | 1.65                    | 0.95/0.89  |              |                 |                      |
| Tyr-36        | 7.88 | 4.57       | 3.27/3.17 |                         |            |              |                 | 2/6 7.12<br>3/5 6.85 |
| Pro-37        |      | 4.28       | 2.39/1.90 | 2.19/2.04               | 3.87       |              |                 |                      |
| Leu-38        | 7.23 | 4.23       | 1.82      | 1.73                    | 1.01/0.94  |              |                 |                      |

Table S1. Cont.

|        | HN   | H $\alpha$ | H $\beta$ | H $\gamma$ | H $\delta$ | H $\epsilon$ | NH <sub>2</sub> | Ar H     |
|--------|------|------------|-----------|------------|------------|--------------|-----------------|----------|
| Ala-39 | 8.27 | 4.08       | 1.47      |            |            |              |                 |          |
| Ser-40 | 8.20 | 4.18       | 3.94/3.76 |            |            |              |                 |          |
| Leu-41 | 7.88 | 4.19       | 1.92/1.83 | 1.71       | 0.98/0.93  |              |                 |          |
| Arg-42 | 8.18 | 4.08       | 1.98/1.84 | 1.75       | 3.25/3.18  |              | 7.20            |          |
| Ser-43 | 7.95 | 4.33       | 4.06/3.96 |            |            |              |                 |          |
| Leu-44 | 7.83 | 4.19       | 1.75      | 1.63/1.57  | 0.86/0.78  |              |                 |          |
| Phe-45 | 8.03 | 4.67       | 3.36/3.04 |            |            |              |                 | 2/6 7.33 |
| Gly-46 | 8.04 | 4.04       |           |            |            |              |                 |          |
| Ser-47 | 7.96 | 4.53       | 3.96      |            |            |              |                 |          |
| Asp-48 | 8.28 | 5.09       | 3.09/2.88 |            |            |              |                 |          |
| Pro-49 |      | 4.47       | 2.35      | 2.07       | 3.84/3.72  |              |                 |          |
| Ser-50 | 8.00 | 4.50       | 4.00/3.93 |            |            |              |                 |          |
| Ser-51 | 8.06 | 4.53       | 4.00/3.95 |            |            |              |                 |          |
| Gln-52 | 8.05 | 4.47       | 2.27/2.06 | 2.40       |            |              | 7.39/6.62       |          |

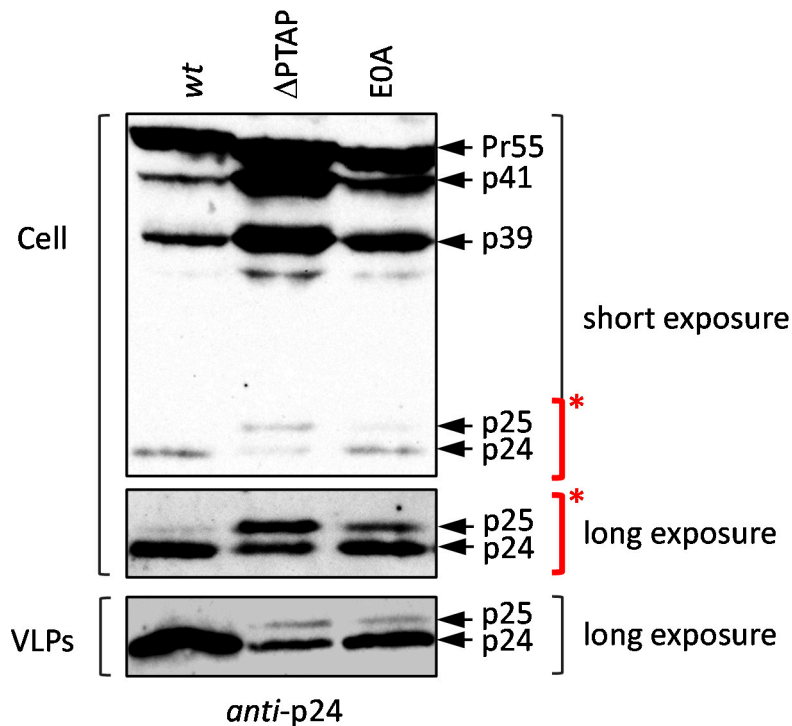

**Figure S1.** Western blot analysis of virus and cell fractions of *wt*,  $\Delta$ PTAP and E0A expressing HeLa cells using a high performance chemiluminescence film. HeLa cells were transfected with pNLenv1 expression plasmids directing the expression of *wt*,  $\Delta$ PTAP, and E0A. VLP fractions and whole cell lysates were separated by SDS PAGE and analyzed by western blot using an anti-CA antibody. Short time exposure: 30 s; long time exposure: 5 min; \* same region of the western blot.

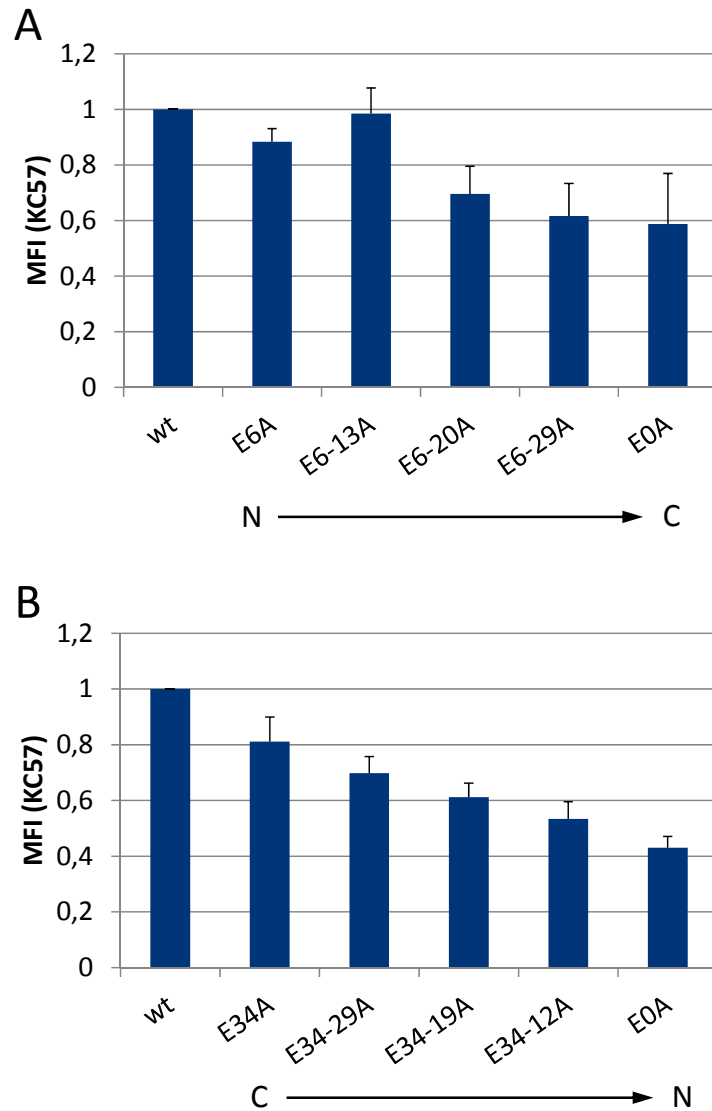

**Figure S2.** MFI of intracellular Gag staining corresponding to the experiments depicted in Figure 7. HeLa-K<sup>b</sup> cells were transiently transfected with pNLenv1-SL expression plasmids coding for *wt* or the sequential Glu mutants of p6 from (A) the N- to the C-terminus; or (B) the C- to the N-terminus, respectively. Intracellular Gag was stained with *anti-Gag* Ab KC57-FITC.

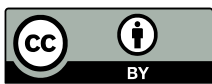

© 2016 by the authors; licensee MDPI, Basel, Switzerland. This article is an open access article distributed under the terms and conditions of the Creative Commons by Attribution (CC-BY) license (<http://creativecommons.org/licenses/by/4.0/>).
